# Supplementary material
Source: PubMed Central journal article supplement (PMC3345973)
Supplement: mt2011313x2.pdf [file mt2011313x2.pdf]

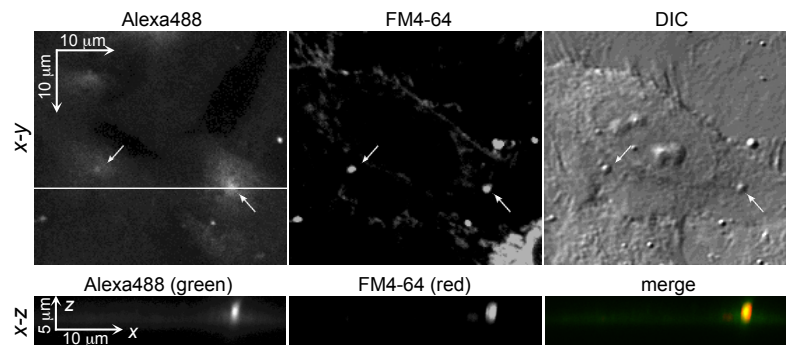

**Figure S2 The R12-Alexa488 spots strongly co-localize with transiently formed membrane particles.** Arrows indicate co-localization of the peptide influx sites and FM4-64 staining at the sites of particle formation (upper panel). X-Z sectioning images were obtained by scanning the horizontal line indicated in the upper panel (left image, white line) at 500-nm intervals (lower panel). The peptide influx sites in both the X-Y and X-Z images were specifically stained with FM4-64. See **Supplementary Materials and Methods** for experimental details.
