# Supplementary material
Source: PubMed Central journal article supplement (PMC3345973)
Supplement: mt2011313x3.pdf [file mt2011313x3.pdf]

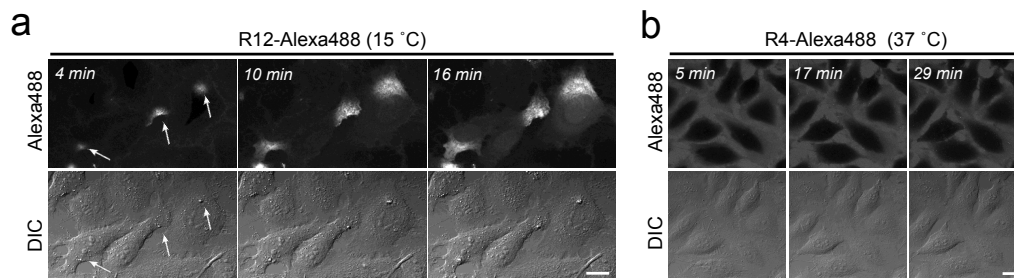

**Figure S3 (a) Time-lapse images of cells incubated with R12-Alexa488 (5  $\mu$ M) in serum-free medium [ $\alpha$ -MEM(-)] at 15°C. Arrows indicate peptide influx points (fluorescence imaging for Alexa488) and membrane particles (DIC imaging). (b) Significant influx of the R4-Alexa488 peptide and particle structure formation were not detected in cells incubated with R4-Alexa488 (15  $\mu$ M). Scale bar = 20  $\mu$ m.**
