# Supplementary material
Source: PubMed Central journal article supplement (PMC3345973)
Supplement: mt2011313x4.pdf [file mt2011313x4.pdf]

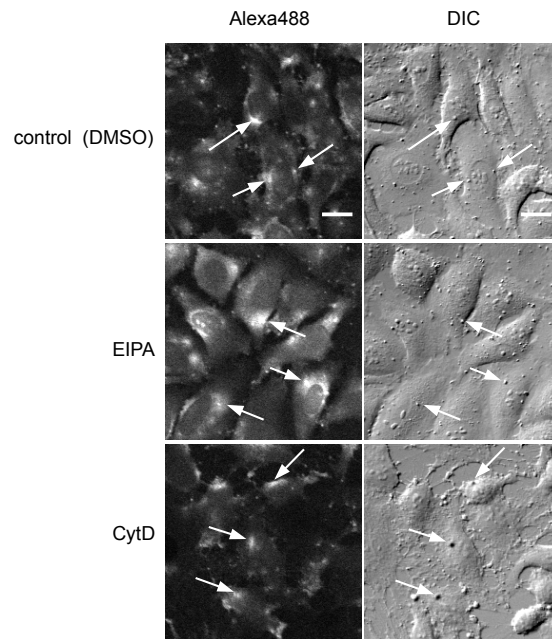

**Figure S4 The effect of macropinocytosis inhibitors on the formation of membrane particles.** HeLa cells were treated with R12-Alexa488 (5  $\mu$ M) in the presence of either EIPA (100  $\mu$ M) or CytD (5  $\mu$ M) at 37°C for 5 minutes. Arrows indicate membrane particles. Scale bar = 20  $\mu$ m.
