# Supplementary material
Source: PubMed Central journal article supplement (PMC3345973)
Supplement: mt2011313x5.pdf [file mt2011313x5.pdf]

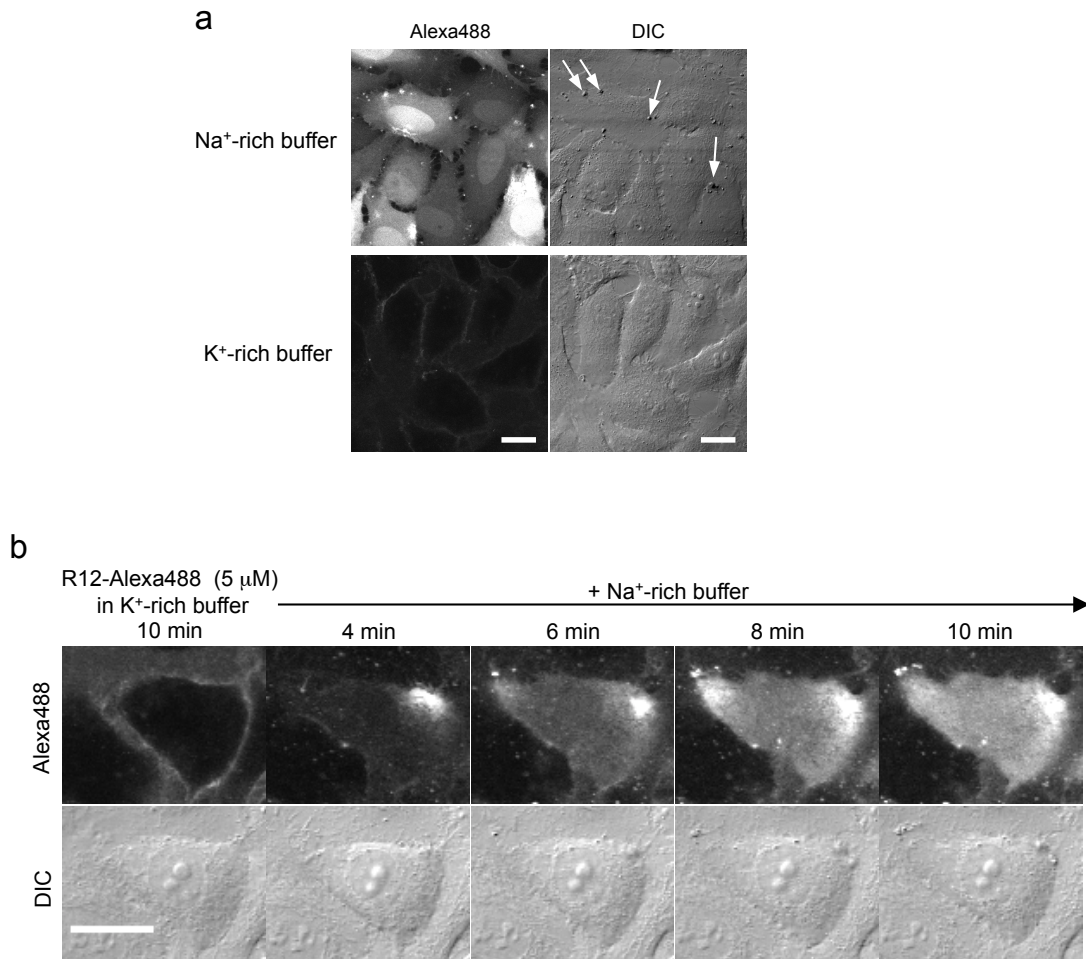

**Figure S5 Effect of membrane potential on particle formation and influx of R12-Alexa488 into cells. (a)** HeLa cells were treated with R12-Alexa488 (5  $\mu$ M) for 10 minutes at 37°C in Na<sup>+</sup>-rich buffer (140 mM NaCl, 3 mM KCl, 1 mM MgCl<sub>2</sub>, 1 mM CaCl<sub>2</sub>, 5 mM glucose, 20 mM HEPES, pH 7.4), which maintains the membrane potential, or K<sup>+</sup>-rich buffer (40 mM KCl, 100 mM potassium glutamate, 1 mM MgCl<sub>2</sub>, 1 mM CaCl<sub>2</sub>, 5 mM glucose, 20 mM HEPES, pH 7.4), which reduces the membrane potential. Arrows indicate membrane particles. **(b)** Recovery of the membrane potential led to the influx of R12-Alexa488 into cells. HeLa cells were treated with R12-Alexa (5  $\mu$ M) in K<sup>+</sup>-rich buffer for 10 minutes at 37°C. An excess volume of Na<sup>+</sup>-rich buffer was then added to the medium. Scale bar = 20  $\mu$ m.
