# Supplementary material
Source: PubMed Central journal article supplement (PMC3345973)
Supplement: mt2011313x6.pdf [file mt2011313x6.pdf]

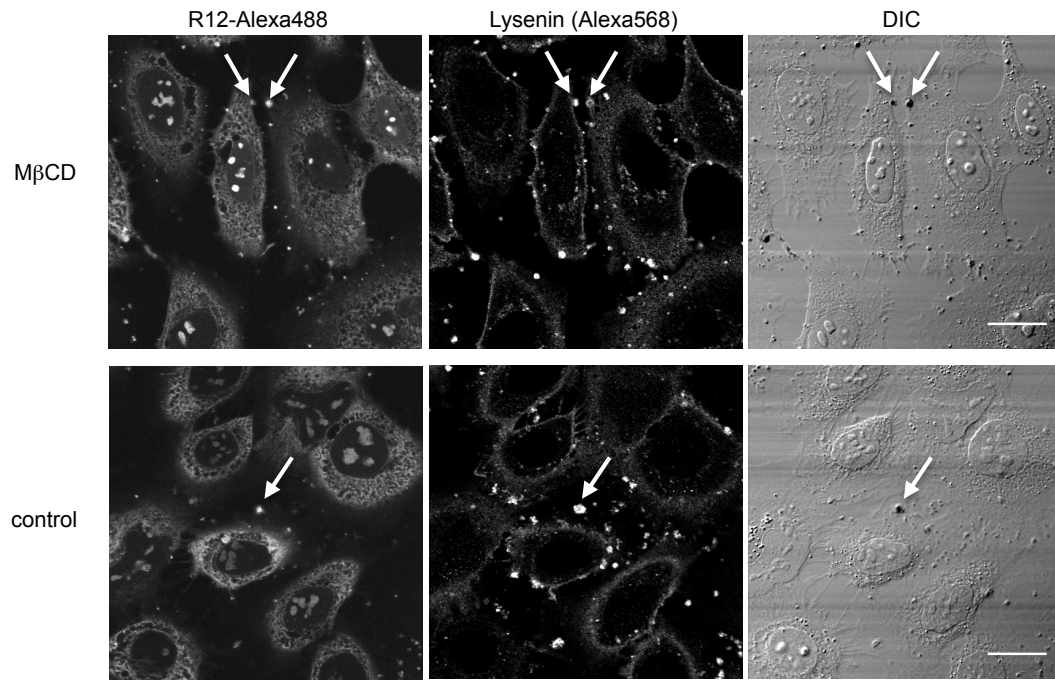

**Figure S6 Immunofluorescence staining of M $\beta$ CD-treated and control cells with lysenin.** Arrows indicate membrane particles. Scale bar = 20  $\mu$ m. See **Supplementary Materials and Methods** for experimental details.
