# Supplementary material
Source: PubMed Central journal article supplement (PMC3345973)
Supplement: mt2011313x8.pdf [file mt2011313x8.pdf]

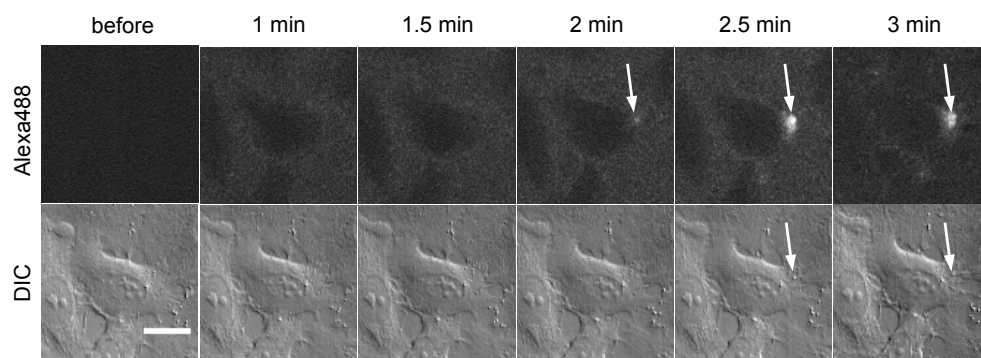

**Figure S8 Live-cell imaging for correlative light and electron microscopy (CLEM) (see also Figure 5).** HeLa cells were treated with R12-Alexa488 (5  $\mu\text{M}$ ) in  $\alpha\text{-MEM}(-)$ . Particle formation (arrow) was observed by live-cell imaging using a confocal microscope. Cells were fixed through incubation with GA for 3 minutes after the addition of R12-Alexa488 (1 minute after particle formation). Scale bar = 20  $\mu\text{m}$ .
