# Supplementary material
Source: PubMed Central journal article supplement (PMC3345973)
Supplement: mt2011313x9.pdf [file mt2011313x9.pdf]

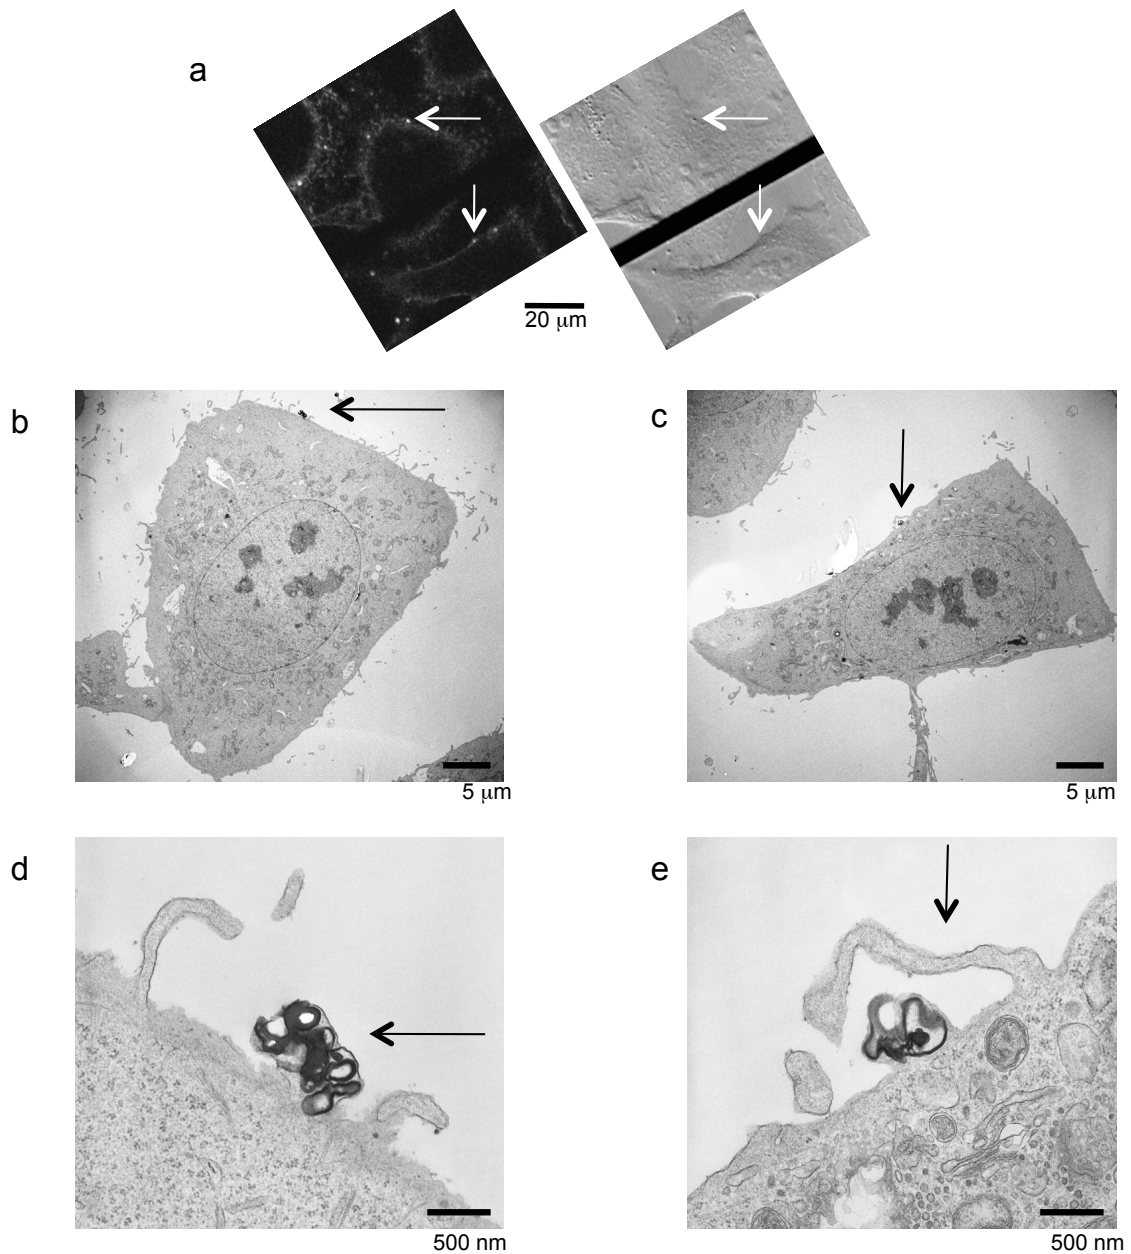

**Figure S9 Correlative light and electron microscopy (CLEM) of cells treated with R12-Alexa488 for 1 minute at 4°C.** (a) HeLa cells were fixed with GA after treatment with R12-Alexa488 (5 μM) in α-MEM (-) for 1 minute at 4°C. Arrows indicate particles observed by confocal microscopy. Scale bar = 20 μm. (b,c) Electron microscopic images of the same cells identified by arrows in (a). Scale bar = 5 μm. (d,e) Enlarged images of the areas indicated by arrows in (b) and (c). Scale bar = 500 nm.
