# Supplementary material
Source: PubMed Central journal article supplement (PMC3345973)
Supplement: mt2011313x10.pdf [file mt2011313x10.pdf]

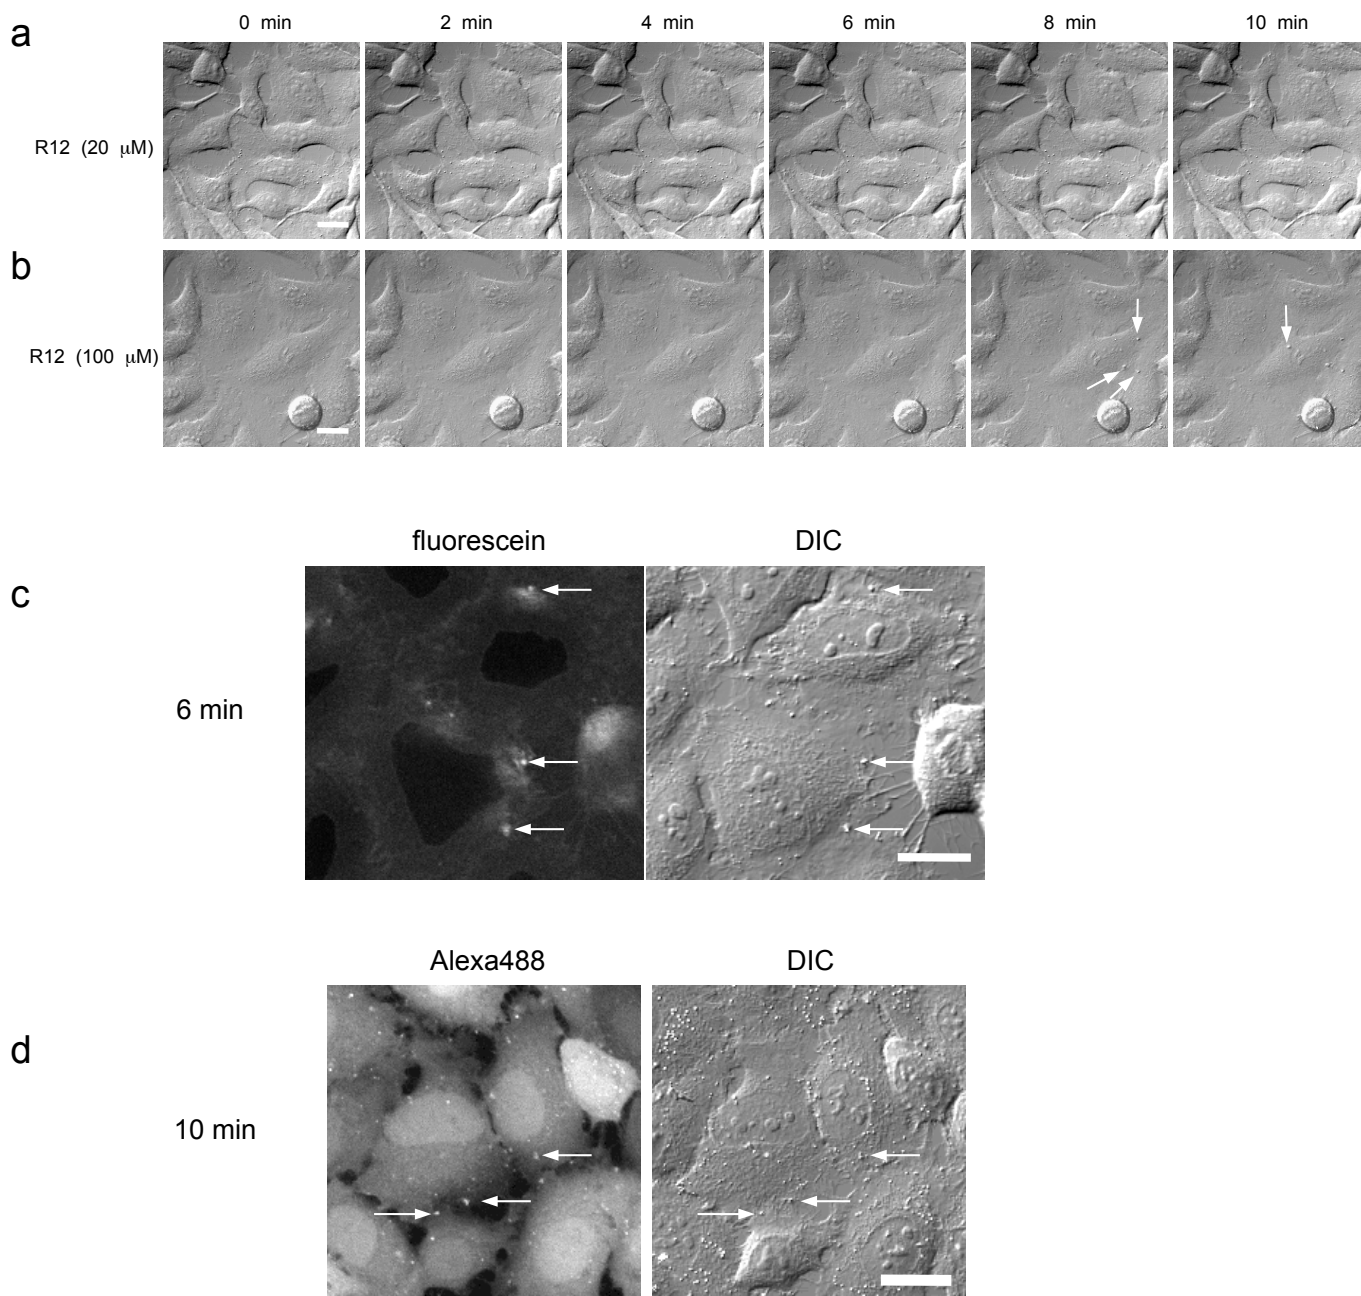

**Figure S10 Treatment of HeLa cells with non-labeled R12, R12-fluorescein, and Hexanoyl R8-Alexa488.** HeLa cells were incubated with (a) 20  $\mu\text{M}$  or (b) 100  $\mu\text{M}$  non-labeled R12 in PBS supplemented with 1 mM  $\text{CaCl}_2$  and 1 mM  $\text{MgCl}_2$  (PBS(+)) at 37°C. Images were captured immediately prior to the addition of the arginine peptides (time 0). (c, d) HeLa cells were incubated with (c) 5  $\mu\text{M}$  fluorescein-labeled R12 (R12-fluorescein) in PBS(+) for 6 min or (d) 10  $\mu\text{M}$  Alexa488-labeled hexanoyl R8 (Hexanoyl R8-Alexa488) in  $\alpha\text{-MEM}(+)$  for 10 min. Arrows indicate membrane particles. Scale bars = 20  $\mu\text{m}$ .
