# Supplementary material
Source: PubMed Central journal article supplement (PMC3345973)
Supplement: mt2011313x11.pdf [file mt2011313x11.pdf]

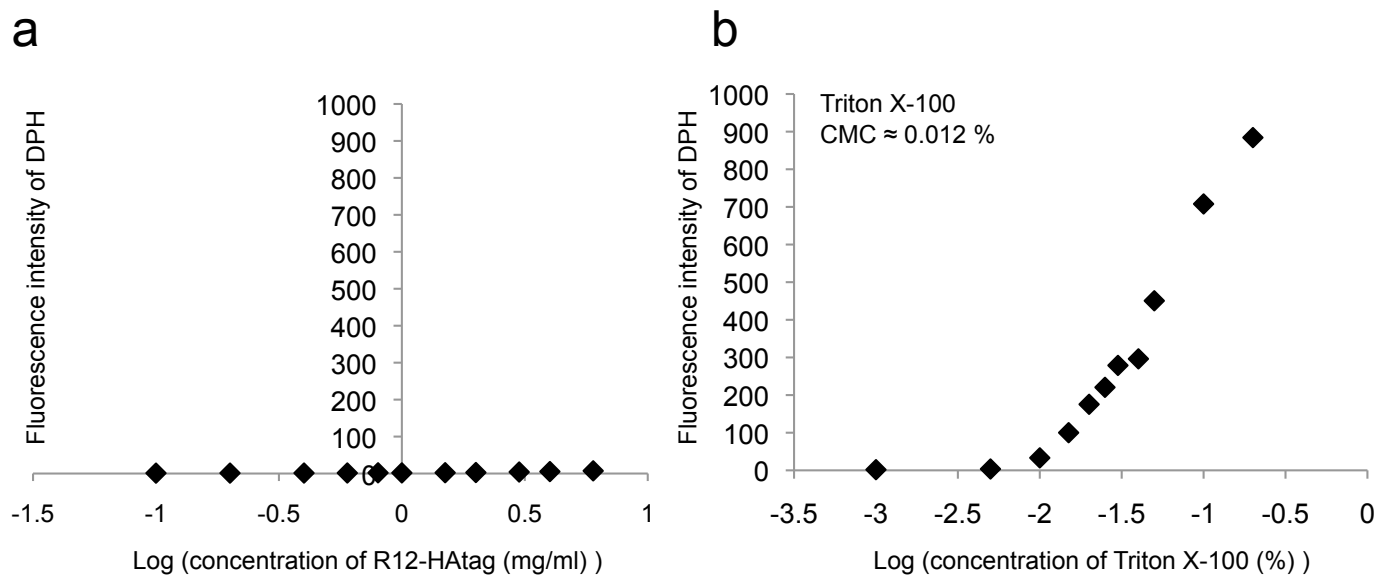

**Figure S11 Analysis of critical micelle concentration (CMC).** CMCs of (a) R12-HAtag and (b) Triton X-100 (positive control) in PBS(+) were analyzed using 4  $\mu$ M 1,6-diphenyl-1,3,5-hexatriene (DPH). The various concentrations of peptide (0–6 mg/mL,  $\sim$ 0–2 mM) and Triton X-100 were dissolved in PBS containing 4  $\mu$ M DPH. Samples were incubated for 16 h at 4°C. Fluorescence intensities of DPH in the presence of 0–6 mg/mL R12-HAtag or 0–0.2% Triton X-100 were measured at 428 nm, with excitation at 355 nm, using a spectrofluorometer (RF-5300PC, Shimadzu).
