# Supplementary material
Source: PubMed Central journal article supplement (PMC3345973)
Supplement: mt2011313x12.pdf [file mt2011313x12.pdf]

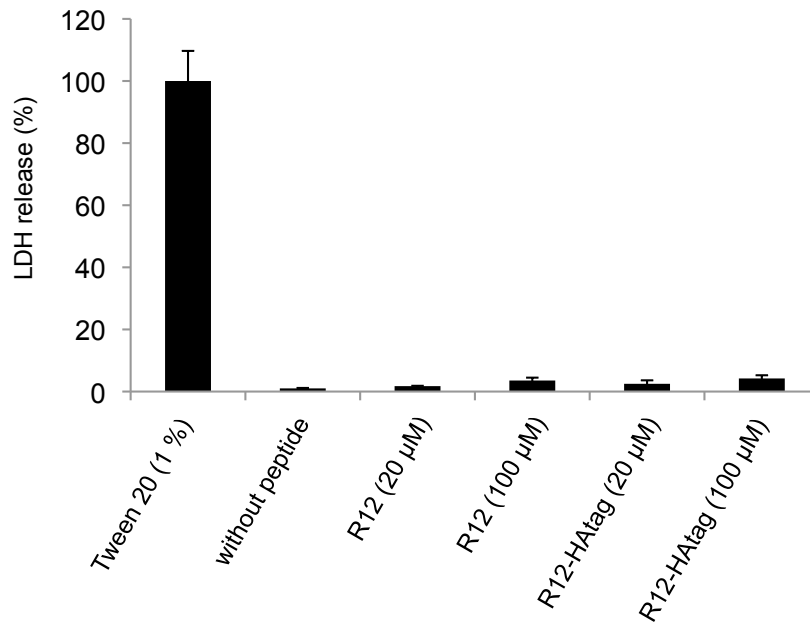

**Figure S12 Assessment of plasma membrane integrity by LDH release assay.** HeLa cells were incubated with each peptide for 30 min in PBS(+). Cells incubated with Tween-20 were used as a positive control. Error bars indicate the mean  $\pm$  SD of a single experiment performed in triplicate.
