# Supplementary material
Source: PubMed Central journal article supplement (PMC3345973)
Supplement: mt2011313x13.pdf [file mt2011313x13.pdf]

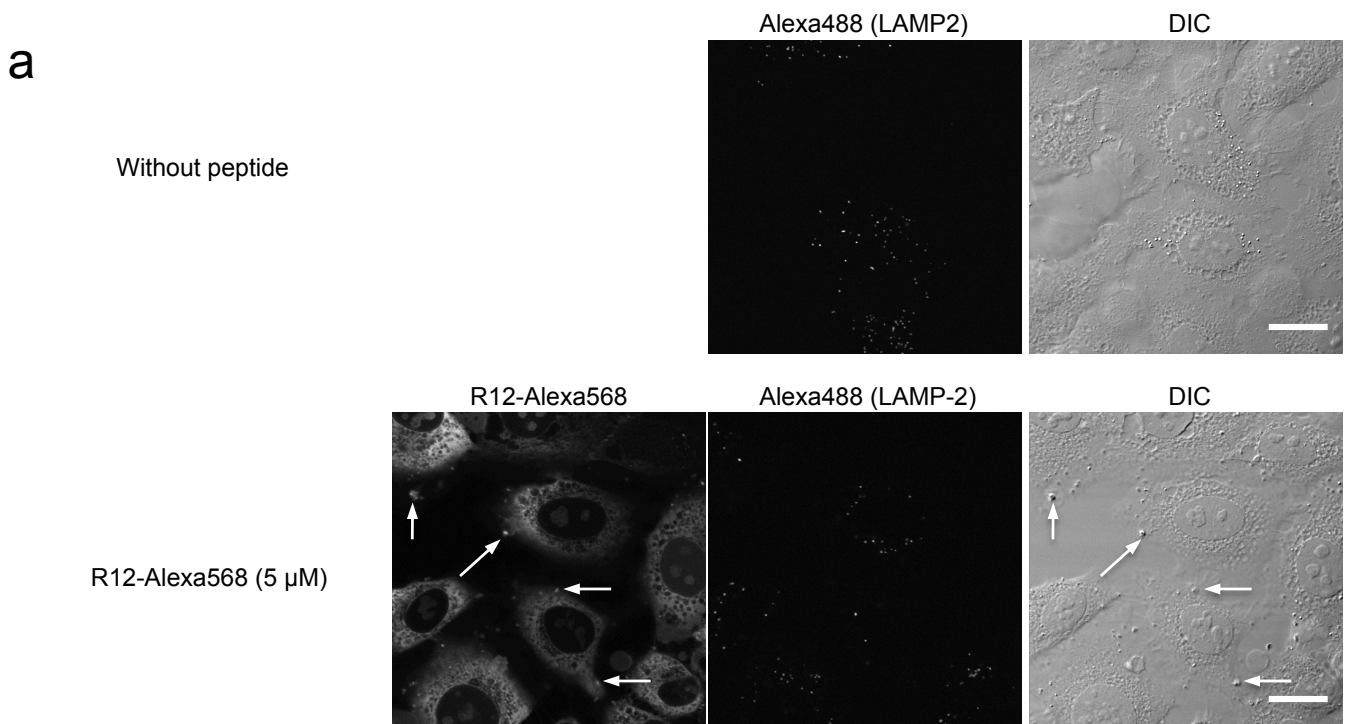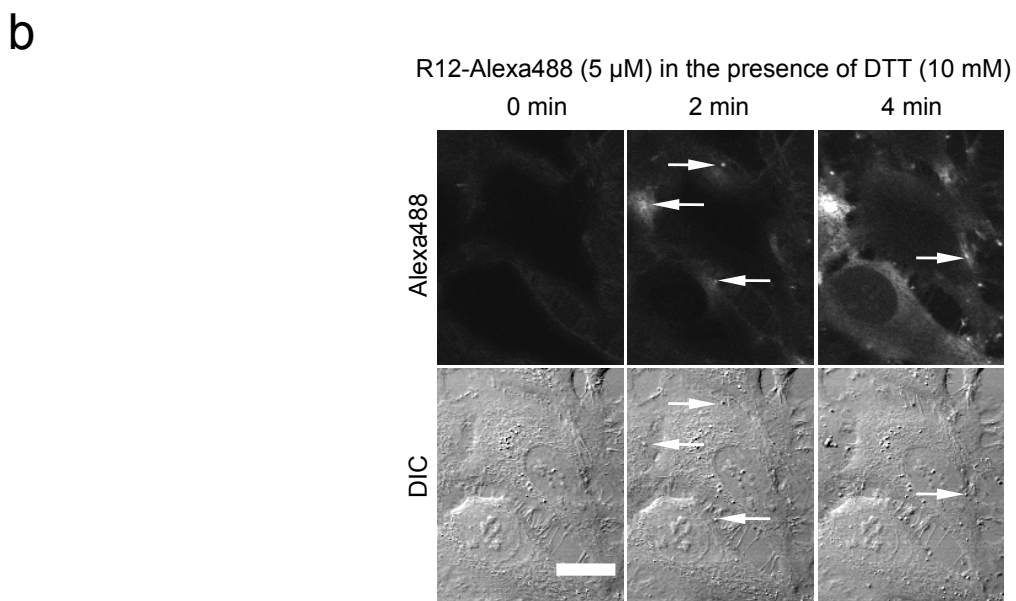

**Figure S13 Examination of plasma membrane-repair responses.** (a) Immunostaining of LAMP-2 after cells were incubated with 5  $\mu$ M R12-Alexa568 for 5 min. The recruitment of LAMP-2 was not observed at the locations of membrane-particle formation. Anti-LAMP2 monoclonal antibody and Alexa488-labeled anti-mouse secondary antibody were used to detect LAMP2. (b) Time-lapse observation of membrane-particle formation after cells were incubated with 5  $\mu$ M R12-Alexa488 in the presence of 10 mM DTT. Arrows indicate membrane particles. Scale bars = 20  $\mu$ m.
