# Supplementary material
Source: PubMed Central journal article supplement (PMC3345973)
Supplement: mt2011313x14.pdf [file mt2011313x14.pdf]

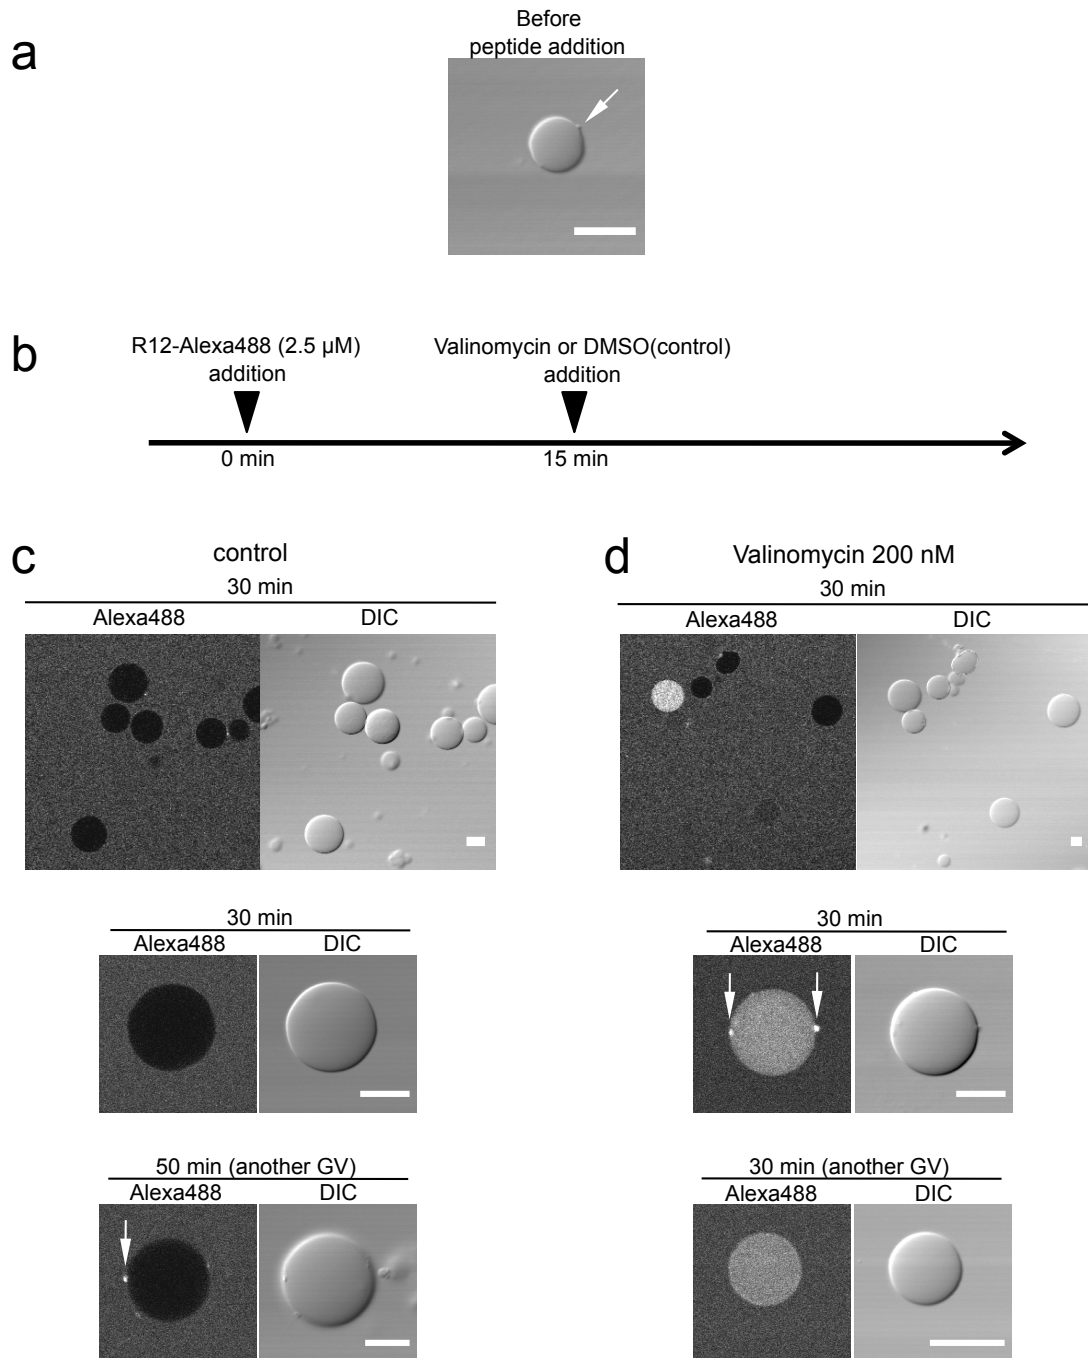

**Figure S14 R12-Alexa488 translocation into GVs that mimic plasma membranes with membrane potential.** (a) A representative GV before the addition of R12-Alexa. (b) Time course of the addition of the peptide and valinomycin or DMSO. (c) The distribution of the peptide at 30 min and 50 min in the absence of valinomycin. (d) The distribution of the peptide at 30 min in the presence of 200 nM valinomycin. White arrows indicate particle-like structures. Scale bars = 20  $\mu$ m.
